# Supplementary material
Source: PubMed Central journal article supplement (PMC4331025)
Supplement: NIHMS411370-supplement-1.pdf [file NIHMS411370-supplement-1.pdf]

## SUPPLEMENTAL MATERIAL

### Expanded Methods

#### Cell preparation and transient expression of wt and mutant ZASP1

Wt and mutant ZASP1 were generated as previous described.<sup>1</sup> Cell preparation and transient transfection were performed as previously described. Sarcomere disturbances were carried out by the incubation of HEK-293 cells for 30 minutes in the medium containing 30  $\mu$ M ML-7 (Sigma-Aldrich, MO) or Cytochalasin D (Cyto-D, Sigma-Aldrich, MO). The effects of wt and mutant ZASP1 on  $I_K$  were studied in CHO cells which stably expressed KCNQ1 and KCNE1, or KCNH2 and KCNE2 with transient expression of ZASP1-wt or ZASP1-D117N.

#### Neonatal rat cardiomyocyte (NRCM) isolation and transient expression of wt and mutant ZASP1

All procedures were approved by the Institutional Animal Care and Use Committee at the Texas Heart Institute. The neonatal rat cardiomyocytes were isolated according to the procedure as previously described.<sup>10</sup> Briefly, neonates (<3 days after birth) were deeply anesthetized with pentobarbiturate (i.p.). The hearts were excised quickly and rinsed in ice-cold PBS (Dulbecco's phosphate-buffered saline, Invitrogen, Carlsbad, CA). The ventricles were transferred to a dry Petri dish and minced with a scalpel blade. The minced hearts were digested in a warm collagenase II and procaine. The digested cells were resuspended in adhesion medium: DMEM (ATCC, Manassas, VA) supplemented with 10% FBS and 2 mM glutamate. The cells were

placed on a 100 mm Petri dish and incubated for 1-1.5 hours at 37°C with 5% CO<sub>2</sub>. After fibroblasts were settled and stick to the bottom of the dish, the supernatants were collected. Cardiomyocytes (1-2 millions) were aliquot into a 1.5 ml Eppendorf tube and centrifuged. The cells were resuspended in a transfection buffer (VPE-1002, Amaxa, Gaithersburg, MD) with 10 µg plasmid pcDNA3.1-CT-GFP-TOPO containing either *ZASPI*-wt or *ZASPI*-D117N cDNA and transferred into cuvettes. The transfection (nucleofection) was performed with an electroporator according to the company's protocol (Nucleofector-I Amaxa, Gaithersburg, MD). The cells were incubated for 24 hours at 37°C with 5% CO<sub>2</sub>. The cells showing green fluorescence were selected to recode sodium currents ( $I_{Na}$ ).

### **Patch-clamp**

Experiments were carried out at ambient temperature unless otherwise stated. For  $I_{Na}$  recording, the pipette solution contained (in mM): 5 NaF, 115 CsF, 20 CsCl, 10 EGTA and 10 HEPES (pH 7.35 with CsOH), and the bath solution contained (in mM): 145 NaCl, 1.0 MgCl<sub>2</sub>, 10 tetraethylammonium (TEA) chloride, 5 CsCl, 10 HEPES, and 10 glucose (pH 7.35 with NaOH). Whole-cell currents amplitude and gating kinetics were analyzed with Clampfit (Axon Instruments, Sunnyvale, CA) and Igor software (WaveMetrics, Lake Oswego, OR).

### **Immunohistochemistry**

Following antibodies were used: (1) mouse monoclonal anti-telethonin/T-Cap (1:100,

Sigma-Aldrich); (2) mouse monoclonal anti-ACTN2 (1:200); (3) rabbit polyclonal anti-dystrophin (DMD, 1:200); and (4) rabbit polyclonal anti-  $\alpha_1$ -syntrophin (SNTA1, 1:200). F-actin was labeled with fluorescent phalloidin (1:500, Invitrogen). The nucleus was labeled with To-pro 633 nm (Invitrogen).

### ***In vitro* interaction pull-down assay**

To produce ZASP and Na<sub>v</sub>1.5, E. coli were transformed with pcDNA 3.1/V5-His containing ZASP1-wt or ZASP1-D117N, and SCN5A. The purified ZASP1-wt (His) or ZASP1-D117N (His) was incubated with preys: the purified Na<sub>v</sub>1.5 from HEK-293 cells, and the lysate from NRCMs. The eluted proteins were separated by SDS-PAGE, and stained with anti-pan voltage-gated sodium channel (1:100), anti-telethonin (1:100), and anti- $\alpha$ -actinin antibodies (1:100). The pcDNA3.1/V5-His-TOPO/lacZ (Invitrogen, Carlsbad, CA) was used for negative controls.

## Supplemental Experiments

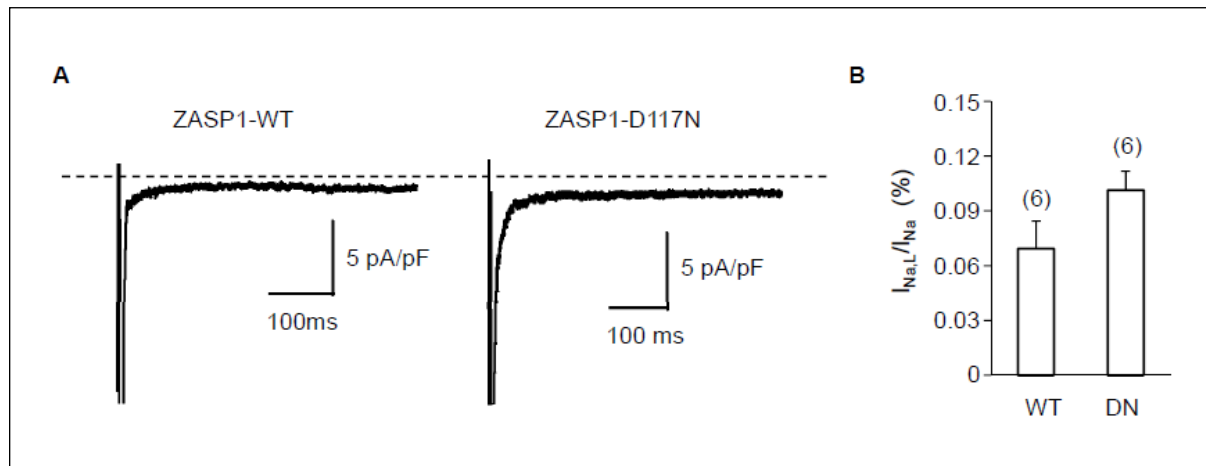

### Supplemental Figure S-I. Effects of ZASP1-wt and ZASP1-D117N on the late $I_{Na}$ .

(A) Representative traces of late  $I_{Na}$  ( $I_{Na,L}$ ) obtained from the cells stably expressing Nav1.5 transfected with ZASP-wt or ZASP-D117N.  $I_{Na,L}$  was induced with a long depolarization pulse (-30 mV for 1000 ms from a holding potential of -80 mV). (B) Bar graph demonstrates the normalized amplitudes of  $I_{Na,L}$  obtained from the cells transfected with ZASP1-wt or ZASP1-D117N.  $I_{Na,L}$  were measured at 200 to 220 ms of the test pulse, and normalized by the peak  $I_{Na}$ . The numbers in the parenthesis depict the number of cells studied. The error bars represent SD.

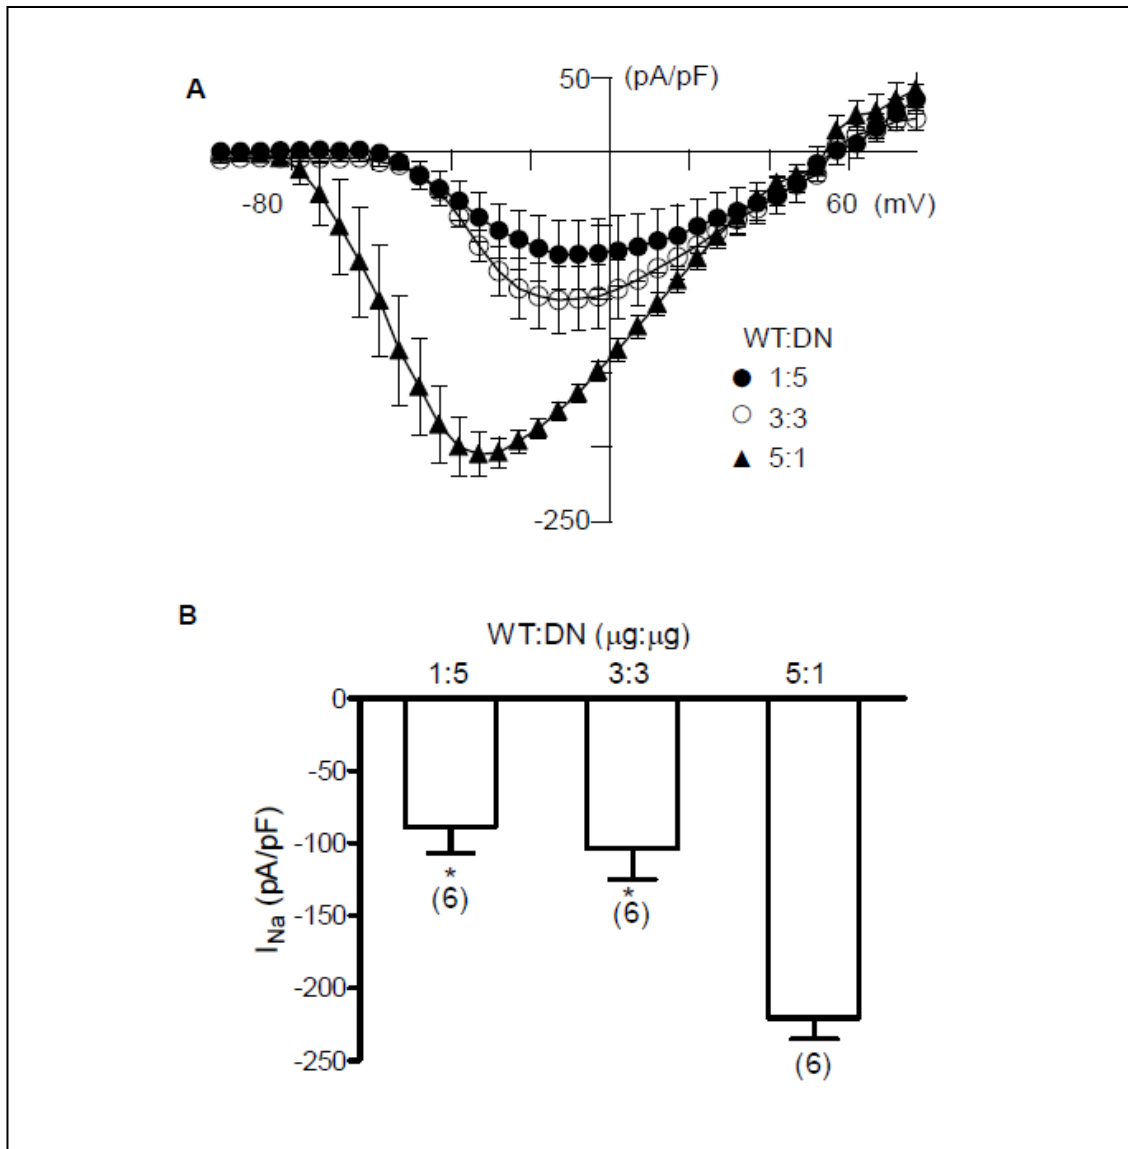

**Supplemental Figure S-II. Effects of different ratios of ZASP1-wt and ZASP1-D117N**

**plasmids on  $\text{Na}_v1.5$ .** (A) The I-V relationships of peak  $I_{\text{Na}}$  obtained from the cells transfected with various combinations of ZASP1-wt and ZASP1-D117N plasmids: 1  $\mu\text{g}/5 \mu\text{g}$ ; 3  $\mu\text{g}/3 \mu\text{g}$ ; 5  $\mu\text{g}/1 \mu\text{g}$ . (B) The bar graphs of peak  $I_{\text{Na}}$  for each condition. The numbers in the parenthesis depict the number of cells studied. The error bars represent SD. \* $p < 0.05$  vs. 5  $\mu\text{g}/1 \mu\text{g}$ .

## Effects of ZASP1-D117N on delayed rectifier potassium channels

Since abnormal repolarization may also cause cardiac conduction disturbances, we sought to investigate whether ZASP1-D117N can affect the function of two major components of delayed rectifier potassium channels (the slow component,  $I_{Ks}$  and the rapid component,  $I_{Kr}$ ). The experiments were conducted in the CHO cells stably-transfected with *KCNQ1* with *KCNE1* or *KCNH2* with *KCNE2*, which mimics  $I_{Ks}$  and  $I_{Kr}$ , respectively. **Supplemental Figure S-III** showed that the steady-state peak  $I_{Ks}$  (Panel A) and  $I_{Kr}$  (Panel C) were not significantly affected by ZASP1-D117N. The I-V relationships of the steady-state  $I_{Ks}$  (Panel B) and  $I_{Kr}$  (Panel D) were almost identical between the cells expressing ZASP1-D117N and ZASP1-wt. These results indicate that ZASP1-D117N specifically altered the  $Na_v1.5$  functions. **Supplemental Table S-I** summarizes the parameters.

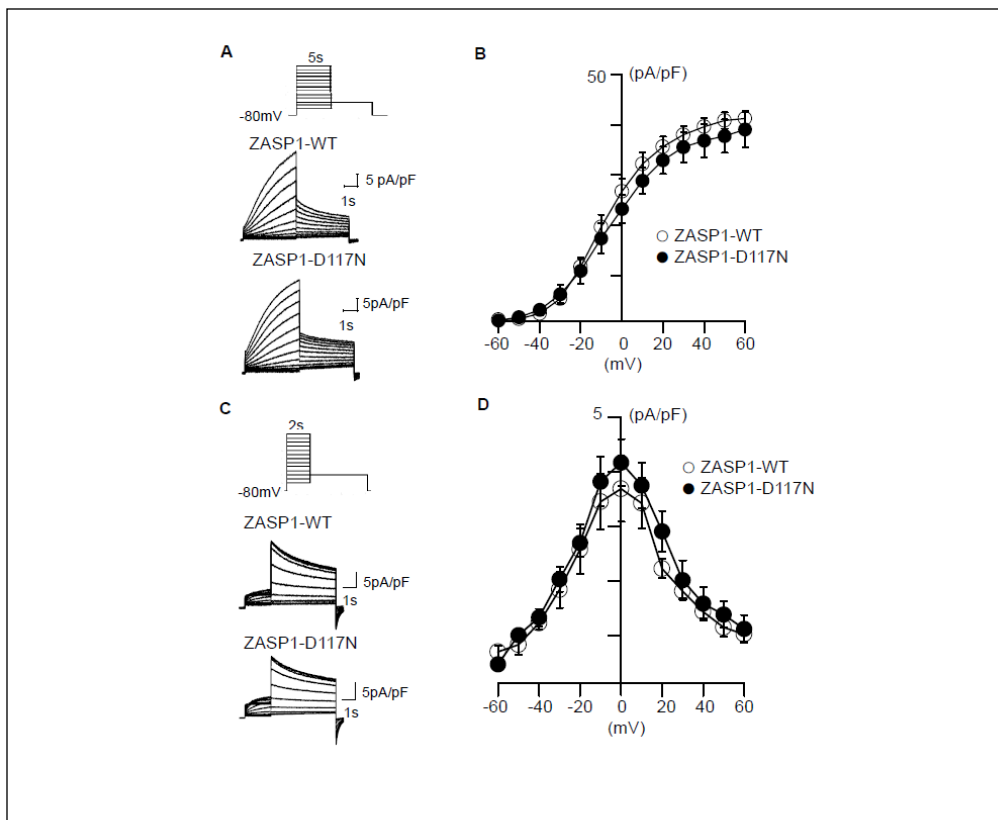

**Supplemental Figure S-III. The effect of ZASP1-wt and ZASP1-D117N on slow delayed rectify potassium currents ( $I_{Ks}$ ) and rapid delayed rectifier current ( $I_{Kr}$ ).** (A) Representative current traces of  $I_{Ks}$ . (B) Current-voltage (I-V) relationship of  $I_{Ks}$  activation. The current amplitude was measured at the end of five second pulse between -60 mV and 60 mV from a holding potential of -80 mV. (C) Representative current traces of  $I_{Kr}$ . (D) I-V relationship of  $I_{Kr}$  activation. The current amplitude was measured at the end of second pulse between -60mV and 60 mV from a holding potential of -80 mV.

**Table S-I. Parameters of  $K^+$  channels**

|                                 | $I_{Ks}$                           |                                   | $I_{Kr}$                     |                              |
|---------------------------------|------------------------------------|-----------------------------------|------------------------------|------------------------------|
|                                 | WT (n=15)                          | D117N (n=11)                      | WT (n=10)                    | D117N (n=9)                  |
| Peak current density (pA/pF)    | 40.6 [36.5; 47.2]<br>(at 60mV)     | 35.2 [33.8; 41.3]<br>(at 60mV)    | 2.4 [1.0; 3.3]<br>(at 0mV)   | 3.2 [0.5; 5.7]<br>(at 0mV)   |
| Tail current density at (pA/pF) | -15.0 [-24.0; -11.7]<br>(at -40mV) | -12.1 [-35.9; -6.7]<br>(at -40mV) | 2.7 [0.4; 4.2]<br>(at -40mV) | 3.6 [1.4; 5.5]<br>(at -40mV) |

Data are presented as median [25th percentile; 75th percentile].
